# Supplementary material for: Atovaquone: An Antiprotozoal Drug Suppresses Primary and Resistant Breast Tumor Growth by Inhibiting HER2/β-Catenin Signaling
Source: Oxford University Press journal article supplement (doi:10.1158/1535-7163.mct-18-1286), 2019-07-03
Supplement: 15357163mct181286-sup-212289_2_supp_5613821_pts8sj.docx [file 15357163mct181286-sup-212289_2_supp_5613821_pts8sj.docx]

**Supplementary Figure S1:** 4T1 and HEK293 cells were treated with various concentrations of atovaquone for 48 hours. Cell survival was measured with sulforhodamine B (SRB) assay.
