# Supplementary material for: Atovaquone: An Antiprotozoal Drug Suppresses Primary and Resistant Breast Tumor Growth by Inhibiting HER2/β-Catenin Signaling
Source: Oxford University Press journal article supplement (doi:10.1158/1535-7163.mct-18-1286), 2019-07-03
Supplement: 15357163mct181286-sup-212289_2_supp_5613822_pts8pj.docx [file 15357163mct181286-sup-212289_2_supp_5613822_pts8pj.docx]

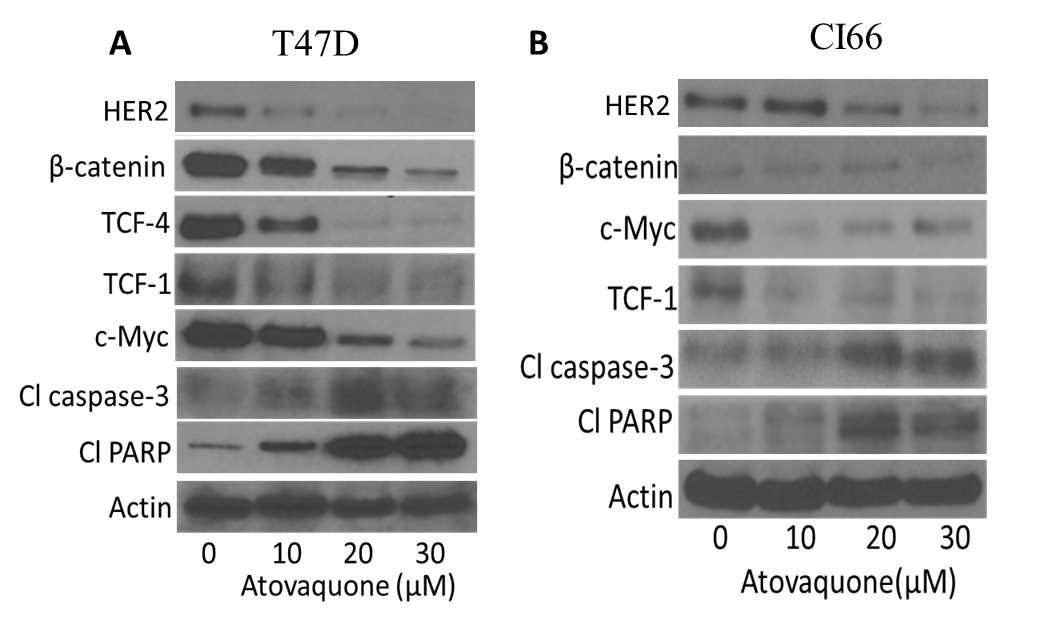


**Supplementary Figure S2:** Western blot showing reduction in expression of HER2, β-catenin, TCF-4, TCF-1, c-Myc and increase in C-caspase3 and C-PARP levels after treatment with atovaquone at indicated concentrations at 72 hours in (A) T47D cells and (B) CI66 cells.
