# Supplementary material for: Atovaquone: An Antiprotozoal Drug Suppresses Primary and Resistant Breast Tumor Growth by Inhibiting HER2/β-Catenin Signaling
Source: Oxford University Press journal article supplement (doi:10.1158/1535-7163.mct-18-1286), 2019-07-03
Supplement: 15357163mct181286-sup-212289_2_supp_5613823_pts8rj.docx [file 15357163mct181286-sup-212289_2_supp_5613823_pts8rj.docx]

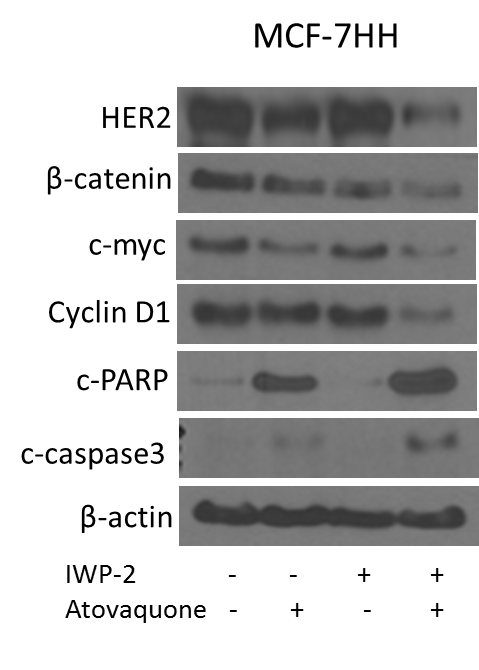


**Supplementary Figure S3:** (A) MCF-7HH cells were treated with β-catenin inhibitor, IWP-2 (20μM) and atovaquone (20μM) alone and in combination for 72 hours. Western blotting was performed using the cell lysates.
