# Supplementary material for: Atovaquone: An Antiprotozoal Drug Suppresses Primary and Resistant Breast Tumor Growth by Inhibiting HER2/β-Catenin Signaling
Source: Oxford University Press journal article supplement (doi:10.1158/1535-7163.mct-18-1286), 2019-07-03
Supplement: 15357163mct181286-sup-212289_2_supp_5613824_pts89j.docx [file 15357163mct181286-sup-212289_2_supp_5613824_pts89j.docx]

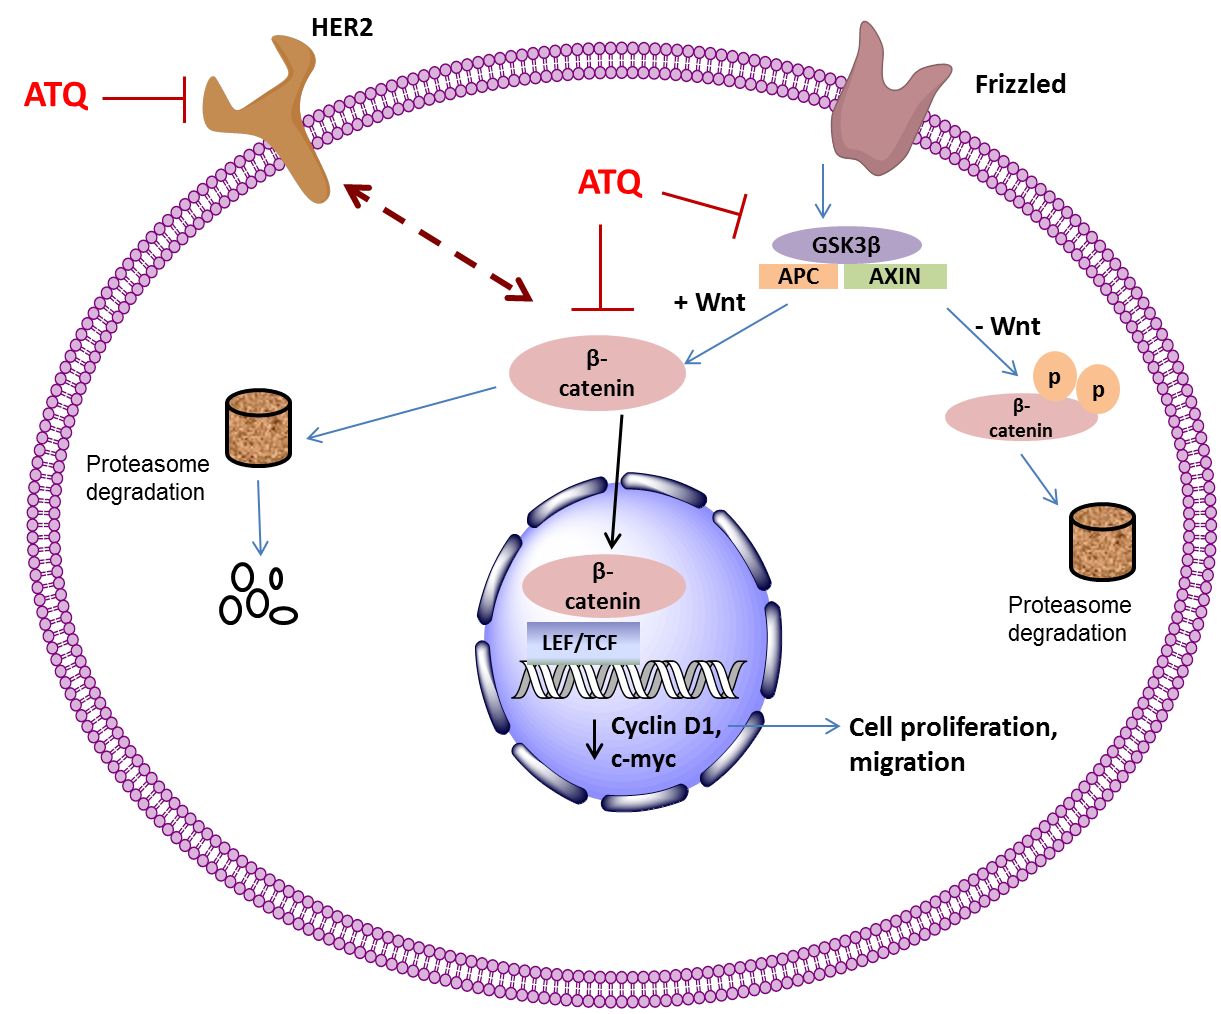


**Supplementary Figure S4:** Schematic diagram depicting mechanism of atovaquone (ATQ) in breast cancer cells. Atovaquone inhibits HER2 mediated β-catenin signaling and its downstream c-Myc, cyclinD1. Atovaquone promotes proteasome mediated degradation of β-catenin in cytoplasm resulting in reduced translocation into nucleus.
